# Supplementary material
Source: HighWire-hosted journal article supplement (https://www.genetics.org/content/suppl/2013/08/21/genetics.113.155309)
Supplement: TableS1.pdf [file TableS1.pdf]

**Table S1** Threshold values of the LRT test statistic (one degree of freedom) under various genome-wide Type I error rates obtained from 1000 permuted samples for the interval mapping (IM) procedure.

| Trait                 | 90%      | 95%      | 99%      | 100%     |
|-----------------------|----------|----------|----------|----------|
| Yield (YD)            | 13.42065 | 15.77650 | 18.62915 | 27.17197 |
| Tiller number (TP)    | 13.19609 | 14.64264 | 19.48538 | 24.24969 |
| Grain number (GN)     | 13.87269 | 15.80410 | 19.45575 | 25.80274 |
| K grain weight (KGW)  | 14.05583 | 15.39363 | 18.51520 | 23.72287 |
| Grain length (GL)     | 13.96338 | 15.56000 | 18.97977 | 27.83338 |
| Grain width (GW)      | 14.04309 | 15.42061 | 18.30397 | 23.41500 |
| Heading date (HD)     | 13.99390 | 15.58231 | 19.25128 | 27.55085 |
| Apicule color (OsC1)  | 13.99859 | 15.43835 | 20.25753 | 25.67522 |
| Mean threshold        | 13.81803 | 15.45227 | 19.10975 | 25.67771 |
| Theoretical threshold | 2.7055   | 3.8414   | 6.6349   | $\infty$ |

The  $x\%$  percentile represents  $\alpha = 1 - x\%$  Type I error rate. For example, the Chi-square threshold under 95% percentile gives the threshold used to control  $\alpha = 1 - 95\% = 0.05$  genome-wide Type I error. The Chi-square threshold divided by  $2\ln(10) \approx 4.61$  gives the LOD score threshold.
